# Supplementary material for: Toward a Dimensional Assessment of Externalizing Disorders in Children: Reliability and Validity of a Semi-Structured Parent Interview
Source: Front Psychol. 2020 Jul 24;11:1840. doi: 10.3389/fpsyg.2020.01840 (PMC7396521; doi:10.3389/fpsyg.2020.01840)
Supplement: Supplementary file 1 [file Table_1.docx]

Supplementary Material

**Supplemental Table 1:** Scale composition and interrater reliability of the ILF-EXTERNAL on the single item level

| **No.** | **Item** | **ICC(1,1)** | **95% CI** | **ICC(1,3)** | **95% CI** | **Pairwise percent agreement** |
| --- | --- | --- | --- | --- | --- | --- |
| ADHD Symptoms (A01-A09; B01-B09) | | .91 | .87 - .95 | .97 | .95 - .98 | 88.1 |
| - Inattention (A01-A09) | | .83 | .74 - .90 | .94 | .89 - .96 | 85.2 |
| A01 | Careless | .73 | .60 - .83 | .89 | .82 - .94 | 76.3 |
| A02 | Sustaining attention | .48 | .30 - .65 | .73 | .57 - .85 | 68.9 |
| A03 | Does not listen | .80 | .70 - .88 | .92 | .87 - .96 | 71.1 |
| A04 | Does not finish work | .69 | .55 - .80 | .87 | .78 - .92 | 72.6 |
| A05 | Organizational skills | .71 | .58 - .82 | .88 | .81 - .93 | 68.9 |
| A06 | Concentration | .74 | .61 - .83 | .89 | .83 - .94 | 68.2 |
| A07 | Loses things | .84 | .76 - .90 | .94 | .90 - .97 | 69.6 |
| A08 | Easily distracted | .64 | .49 - .77 | .84 | .74 - .91 | 73.3 |
| A09 | Forgetful | .76 | .64 - .85 | .90 | .84 - .94 | 62.2 |
| - Hyperactivity-Impulsivity (B01-B09) | | .95 | .91 - .97 | .98 | .97 - .99 | 82.2 |
| B01 | Fidgets | .88 | .82 - .93 | .96 | .93 - .98 | 82.2 |
| B02 | Leaves seat | .84 | .75 - .90 | .94 | .90 - .97 | 74.1 |
| B03 | Runs / climbs | .79 | .68 - .87 | .92 | .86 - .95 | 69.6 |
| B04 | Playing quietly | .77 | .66 - .86 | .91 | .85 - .95 | 65.9 |
| B05 | Driven / on the go | .90 | .85 - .94 | .96 | .74 - .98 | 75.6 |
| B06 | Blurts out answers | .86 | .79 - .92 | .95 | .92 - .97 | 70.4 |
| B07 | Awaiting turn | .87 | .80 - .92 | .95 | .92 - .97 | 71.9 |
| B08 | Interrupts / intrudes | .80 | .70 - .88 | .93 | .88 - .86 | 73.3 |
| B09 | Talks excessively | .86 | .78 - .91 | .95 | .91 - .97 | 77.8 |
| ADHD Functional Impairment (F01-F05) (*n* = 39) | | .89 | .82 - .94 | .96 | .93 - .98 | 80.7 |
| F01 | Psychological strain(*n* = 43) | .85 | .77 - .91 | .95 | .91 - .97 | 76.7 |
| F02 | **﻿**Interferes with home life and family members(*n* = 42) | .77 | .65 - .86 | .91 | .85 - .95 | 74.8 |
| F03 | ﻿Interferes with adult interaction (*n* = 42) | .82 | .72 - .89 | .93 | .88 - .96 | 75.6 |
| F04 | ﻿Interferes with child interactions; ﻿interferes with ﻿recreational activities (*n* = 42) | .84 | .75 - .90 | .94 | .90 | 72.4 |
| F05 | Interferes with educational activities (*n* = 39) | .77 | .66 - .87 | .91 | .81 - .95 | 71.5 |
| ODD/CD Symptoms - short version (A01-A08; B01-B05) | | .94 | .90 - .96 | .98 | .97 - .99 | 91.1 |
| - ODD Symptoms (A01-A08) | | .94 | .90 - .96 | .98 | .96 - .99 | 83.7 |
| A01 | Loses temper1 | .84 | .76 - .90 | .94 | .90 - .97 | 70.4 |
| A02 | Touchy / easily annoyed1 | .89 | .83 - .93 | .96 | .94 - .98 | 80.0 |
| A03 | Angry / resentful1 | .87 | .80 - .92 | .95 | .93 - .97 | 78.5 |
| A04 | Argues with adults | .83 | .74 - .90 | .94 | .90 - .96 | 76.3 |
| A05 | Complies with requests | .80 | .70 - .88 | .92 | .88 - .96 | 69.6 |
| A06 | Annoys | .89 | .83 - .93 | .96 | .94 - .98 | 78.5 |
| A07 | Blames others | .88 | .81 - .92 | .95 | .93 - .98 | 78.5 |
| A08 | Spiteful / vindictive | .90 | .85 - .94 | .97 | .94 - .98 | 91.1 |
| - CD Symptoms - short version (B01-B05) | | .90 | .85 - .94 | .97 | .94 - .98 | 88.2 |
| B01 | Physical fights | .88 | .81 - .93 | .96 | .93 - .98 | 88.9 |
| B02 | Bullies, threatens, or intimidates (*n* = 44) | .85 | .77 - .91 | .95 | .91 - .97 | 79.5 |
| B03 | Cruel to animals | .90 | .85 - .94 | .97 | .94 - .98 | 94.1 |
| B04 | Lies | .77 | .65 - .85 | .91 | .85 - .95 | 65.9 |
| B05 | Steals without confrontation | .78 | .67 - .86 | .91 | .86 - .95 | 86.7 |
| B06 | Uses weapon in fight2 |  | - | - | - | - |
| B07 | Cruel to people2 | - | - | - | - | - |
| B08 | Steals with confrontation2 | - | - | - | - | - |
| B09 | Sexual assault2 | - | - | - | - | - |
| B10 | Fire setting2 | - | - | - | - | - |
| B11 | Vandalism2 | - | - | - | - | - |
| B12 | Breaking in2 | - | - | - | - | - |
| B13 | Stays out at night2 | - | - | - | - | - |
| B14 | Runs away from home overnight2 | - | - | - | - | - |
| B15 | Truancy2 | - | - | - | - | - |
| Disruptive Mood Dysregulation (D01-D02; A01-A03) | | .90 | .85 - .94 | .97 | .94 - .98 | 83.7 |
| D01 | Recurrent temper outbursts | .74 | .61 - .83 | .89 | .83 - .94 | 69.6 |
| D02 | Persistently irritable or angry mood | .70 | .57 - .81 | .88 | .80 - .93 | 65.2 |
| Limited Prosocial Emotions (C01a-C04d) (*n* = 41) | | .93 | .89 - .96 | .98 | .96 - .99 | 86.7 |
| C01a | Lack of remorse / guilt (*n* = 44) | .92 | .88 - .96 | .97 | .96 - .98 | 92.4 |
| C01b | Lack of concern (*n* = 44) | .89 | .82 - .93 | .96 | .93 - .98 | 80.3 |
| C02a | Cold and uncaring (*n* = 44) | .89 | .83 - .94 | .96 | .94 - .98 | 85.6 |
| C02b | Self-serving (*n* = 43) | .92 | .88 - .96 | .97 | .96 - .99 | 87.8 |
| C03a | Indifferent of poor performance (*n* = 42) | .86 | .78 - .92 | .95 | .91 - .97 | 84.1 |
| C03b | Avoids effort (*n* = 42) | .85 | .76 - .91 | .94 | .90 - .97 | 76.2 |
| C03c | Blames others for poor performance (*n* = 42) | .87 | .80 - .93 | .95 | .92 - .97 | 76.2 |
| C04a | Shallow / deficient affect (*n* = 42) | .69 | .56 - .81 | .87 | .79 - .93 | 78.6 |
| C04b | Turns emotions ‘on’ or ‘off’ quickly (*n* = 40) | .81 | .71 - .89 | .93 | .88 - .96 | 80.8 |
| C04c | Manipulates (*n* = 41) | .83 | .73 - .90 | .94 | .89 - .96 | 83.7 |
| C04d | Inconsistent affect (*n* = 41) | .87 | .80 - .93 | .95 | .92 - .97 | 93.5 |
| ODD/CD Functional Impairment (F01-F05) (*n* = 31) | | .92 | .86 - .96 | .97 | .95 - .99 | 85.2 |
| F01 | Psychological strain(*n* = 33) | .79 | .66 - .88 | .92 | .85 - .96 | 72.3 |
| F02 | ﻿Interferes with home life and family members(*n* = 32) | .80 | .67 - .89 | .92 | .86 - .96 | 75.2 |
| F03 | ﻿Interferes with adult interaction (*n* = 32) | .81 | .69 - .89 | .93 | .87 - .96 | 68.0 |
| F04 | ﻿Interferes with child interactions; ﻿interferes with ﻿recreational activities (*n* = 31) | .89 | .81 - .94 | .96 | .93 - .98 | 80.8 |
| F05 | Interferes with educational activities (*n* = 31) | .88 | .80 - .94 | .96 | .92 - .98 | 81.9 |

*Note.* ADHD = attention-deficit/hyperactivity disorder; CD = conduct disorder; CI = confidence interval; ICC = Intraclass correlation; ICC(1,1) = one-way random-effects, absolute agreement model for single rater/measurements; ICC(1,3) = one-way random-effects, absolute agreement model ﻿based on a mean-rating; ODD = oppositional defiant disorder; n = 45 (if not otherwise specified).
1Items also included in the Disruptive Mood Dysregulation scale.
2The items B06 to B15 assessing aggressive and antisocial symptoms from the age of 11 were excluded from further analyses due to an obvious floor effect.

**Supplemental Table 2:** Interrater reliability of the ILF-EXTERNAL scales between two independent raters

| **Scale** | **ICC(2,1)** | **95% CI** | **ICC(2,2)** | **95% CI** | **Pairwise percent agreement** | **n** |
| --- | --- | --- | --- | --- | --- | --- |
| ADHD Symptoms | .95 | .83 - .98 | .97 | .91 - .99 | 86.7 | 45 |
| - Inattention | .84 | .71 - .91 | .91 | .83 - .95 | 82.2 | 45 |
| - Hyperactivity-Impulsivity | .96 | .91 - .98 | .98 | .95 - .99 | 75.6 | 45 |
| ADHD Functional Impairment | .90 | .82 - .95 | .95 | .90 - .97 | 75.6 | 39 |
| ODD/CD Symptoms - short version | .96 | .92 - .98 | .98 | .96 - .99 | 86.7 | 45 |
| - ODD Symptoms | .95 | .90 - .97 | .97 | .95 - .99 | 84.4 | 45 |
| - CD Symptoms - short version | .91 | .84 - .95 | .95 | .91 - .97 | 86.7 | 44 |
| Disruptive Mood Dysregulation | .91 | .85 - .95 | .96 | .92 - .98 | 80.0 | 45 |
| Limited Prosocial Emotions | .97 | .94 - .98 | .98 | .97 - .99 | 82.2 | 41 |
| ODD/CD Functional Impairment | .92 | .84 - .96 | .96 | .91 - .98 | 77.8 | 31 |

*Note.* ADHD = attention-deficit/hyperactivity disorder; CD = conduct disorder; CI = confidence interval; ICC = Intraclass correlation; ICC(2,1) = two-way random-effects, absolute agreement model for single rater/measurements; ICC(2,2) = two-way random-effects, absolute agreement model based on a mean-rating; ODD = oppositional defiant disorder.
